# Supplementary material for: Altered task-based and resting-state amygdala functional connectivity following real-time fMRI amygdala neurofeedback training in major depressive disorder
Source: PubMed Central journal article supplement — Neuroimage Clin. 2017 Dec 5;17:691–703. doi: 10.1016/j.nicl.2017.12.004 (PMC5734798; doi:10.1016/j.nicl.2017.12.004), 2017-12-05
Supplement: mmc1.pdf [file mmc1.pdf]

## CONSORT Flow Diagram

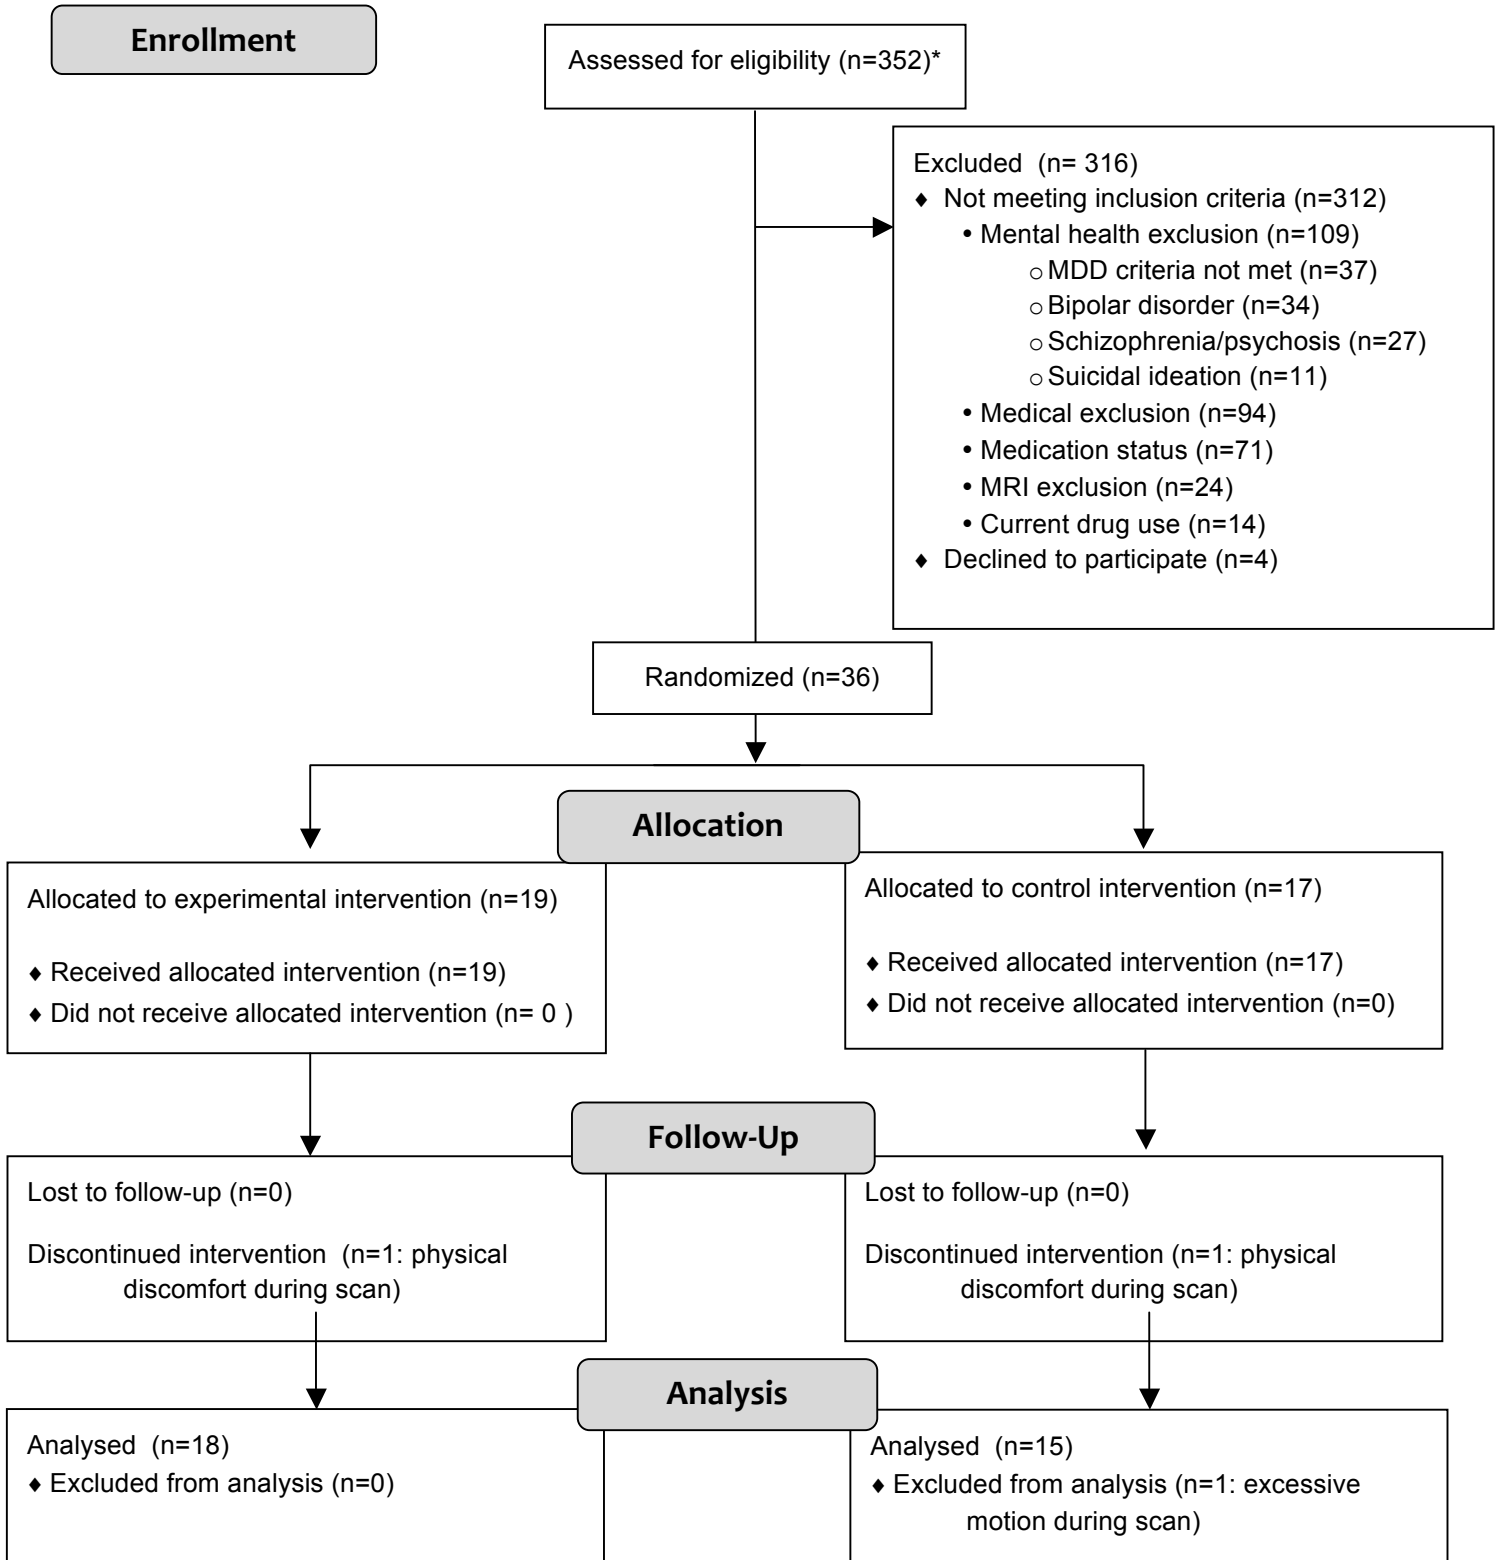

\* Note that participants were screened as part of the general Laureate Institute for Brain Research recruitment for a wide range of studies with varying inclusion/exclusion criteria, and not specifically for this trial.
